# Supplementary material for: Does Green Really Mean Go? Increasing the Fraction of Green Photons Promotes Growth of Tomato but Not Lettuce or Cucumber
Source: PubMed Central journal article supplement (PMC8066606; doi:10.3390/plants10040637), 2021-03-27

**Table S1.** Response of lettuce, cucumber and tomato growth (dry mass) and development (leaf area, stem length and petiole length) to blue photons (B). This analysis only includes the effects of increasing the fraction of blue between 5 and 75% blue, meaning that all treatments contain some red (600 to 699 nm) and blue photons. The complete absence of either red or blue photons often induces abnormal growth and development [25,26], likely caused by under-activation of the photoreceptors cryptochromes and phytochromes [43]. In the Days column the number in bold is the number of days in the treatment, and the other number is the number of days between emergence/planting and moving the plants into the treatments.

| Blue Effects |                  |                      |                                               |                |                                   |                |                           |                                                                                                                      |                       |       |                           |
|--------------|------------------|----------------------|-----------------------------------------------|----------------|-----------------------------------|----------------|---------------------------|----------------------------------------------------------------------------------------------------------------------|-----------------------|-------|---------------------------|
| Species      | Cultivar         | Range of treatments  | PPFD ( $\mu\text{mol m}^{-2} \text{s}^{-1}$ ) | period (h)     | Parameter                         | Effect         | Citation                  | Comment                                                                                                              | CO <sub>2</sub> (ppm) | Temp  | Days                      |
| Lettuce      | Waldmann's Green | 8 and 16%            | 300                                           | 18             | Dry Mass                          | NS             | Yorio et al. 2001         |                                                                                                                      | 1200                  | 23    | <b>21</b>                 |
|              | Grand Rapids     | 6 to 26%             | 200 & 500                                     | 16             | Leaf Area<br>Dry Mass             | NS<br>↑        | Dougher and Bugbee 2001   |                                                                                                                      | 1000                  | 26/22 | <b>4+18</b>               |
|              | Red Fire         | 10 and 26%           | 300                                           | 12             | Leaf Area<br>Dry Mass             | ↓<br>↓         | Ohashi-Kaneko et al. 2007 |                                                                                                                      | 400                   | 20/18 | <b>37</b>                 |
|              | Red Cross        | 16, 23 and 55%       | 300                                           | 16             | Dry Mass                          | NS             | Li and Kubota 2009        |                                                                                                                      | -                     | 25/20 | <b>10+12</b>              |
|              | Sunmang          | 13 to 59%            | 171                                           | 12             | Leaf Area                         | ↓              | Son and Oh 2013           | Grand Rapids lettuce at 47% blue did not fit the trend                                                               | 400                   | 20    | <b>18+28</b>              |
|              | Grand Rapid TBR  |                      |                                               |                | Dry Mass<br>Leaf Area<br>Dry Mass | ↓<br>↓<br>↓    |                           |                                                                                                                      |                       |       |                           |
|              | Waldmann's Green | 11 to 28%            | 200                                           | 16             | Leaf Area                         | -              | Cope et al. 2014          | Results for leaf area at 200 $\mu\text{mol m}^{-2} \text{s}^{-1}$ are difficult to interpret                         | 430                   | 24.5  | <b>21</b>                 |
|              |                  |                      |                                               |                | Dry Mass<br>Leaf Area<br>Dry Mass | NS<br>↓<br>NS  |                           |                                                                                                                      |                       |       |                           |
|              | Red Fire         | 15, 19 and 25%       | 100                                           | 16             | Leaf Area                         | ↓              | Furuyama et al. 2014      | At 200 $\mu\text{mol m}^{-2} \text{s}^{-1}$ the highest dry mass occurred in the middle treatment (19% B)            | 1000                  | 23/20 | <b>4+11</b><br><b>+14</b> |
|              |                  |                      | 200                                           |                | Leaf Area<br>Dry Mass             | NS<br>-        |                           |                                                                                                                      |                       |       |                           |
|              |                  |                      | 300                                           |                | Leaf Area<br>Dry Mass             | ↑<br>↑         |                           |                                                                                                                      |                       |       |                           |
|              | Jeokchima        | 10, 20 and 30%       | 230                                           | 16             | Leaf Area<br>Dry Mass             | ↓<br>NS        | Lee et al. 2014           | Decrease in leaf area only occurs between 20 and 30% B                                                               | 800                   | 22/18 | <b>28</b>                 |
|              | Ostinata         | 12 to 36%            | 150                                           | 16             | Dry Mass                          | -              | Kong et al. 2015          | Results are difficult to interpret. No apparent trend                                                                | 1200                  | 25/18 | <b>39</b>                 |
|              | Sunmang          | 13 to 34%            | 173                                           | 12             | Leaf Area                         | ↓              | Son and Oh 2015           |                                                                                                                      | 400                   | 20    | <b>18+28</b>              |
|              | Grand Rapid TBR  |                      |                                               |                | Dry Mass<br>Leaf Area<br>Dry Mass | ↓<br>↓<br>↓    |                           |                                                                                                                      |                       |       |                           |
|              | Green Oak Leaf   | 23, 30 and 45%       | 135                                           | 16             | Dry Mass                          | -              | Chen et al. 2016          | Results are difficult to interpret. No apparent trend                                                                | 350                   | 22/18 | <b>35</b>                 |
|              | unspecified      | 8 to 50%             | 200                                           | 16             | Leaf Area<br>Dry Mass             | ↓<br>↓         | Wang et al. 2016          |                                                                                                                      | 400                   | 24/20 | <b>30</b>                 |
|              | Sunmang          | 8 to 31%             | 173                                           | 12             | Leaf Area<br>Dry Mass             | ↓<br>↓         | Son et al. 2016           | Results are difficult to interpret. Appears to trend downward                                                        | 400                   | 20    | <b>18+28</b>              |
|              | Waldmann's Green | 11 to 28%            | 200                                           | 16             | Leaf Area                         | NS             | Snowden et al. 2016       |                                                                                                                      | 430                   | -     | <b>21</b>                 |
|              |                  |                      | 500                                           |                | Dry Mass<br>Leaf Area<br>Dry Mass | NS<br>NS<br>NS |                           |                                                                                                                      |                       |       |                           |
|              | Green Skirt      | 10 to 30%            | 150                                           | 16             | Plant diameter                    | ↓              | Kang et al. 2016          |                                                                                                                      | 1000                  | 22/17 | <b>14+28</b>              |
|              | Frill ice        | 20.7, 21.4 and 26.2% | 200                                           | 14             | Dry Mass                          | -              | Yan et al. 2019           | At 200 $\mu\text{mol m}^{-2} \text{s}^{-1}$ in 14 h, the highest dry mass occurred in the middle treatment (21.4% B) | 800                   | 22/18 | <b>20+</b><br><b>20</b>   |
|              |                  |                      | 250                                           | 16<br>14<br>16 |                                   | NS<br>NS<br>NS |                           |                                                                                                                      |                       |       |                           |
|              | Rouxai           | 7 to 33%             | 180                                           | 20             | Plant diameter                    | ↓              | Meng et al. 2019          |                                                                                                                      | 379 to 402            | 20    | <b>30</b>                 |
|              | Rex              |                      |                                               |                | Fresh/Dry Mass<br>Plant diameter  | ↓<br>↓         |                           |                                                                                                                      |                       |       |                           |
|              | Rex Cherokee     | 17 and 50%           | 180                                           | 24             | Dry Mass<br>Dry Mass              | ↓<br>↓         | Meng and Runkle 2019      | Not including FR treatments                                                                                          | -                     | 23    | <b>3 + 12</b>             |

**Table S1.** Continued

| Species        | Cultivar         | Range of treatments                 | PPFD ( $\mu\text{mol m}^{-2} \text{s}^{-1}$ ) | period (h)  | Parameter      | Effect                | Citation                                                            | Comment                                                                                                                                             | CO <sub>2</sub> (ppm) | Temp      | Days             |
|----------------|------------------|-------------------------------------|-----------------------------------------------|-------------|----------------|-----------------------|---------------------------------------------------------------------|-----------------------------------------------------------------------------------------------------------------------------------------------------|-----------------------|-----------|------------------|
| Lettuce        | Ziwei            | 14 to 27%                           | 100                                           | 14          | Dry Mass       | NS                    | Yan et al. 2019b                                                    | At 150, 200 and 250 $\mu\text{mol m}^{-2} \text{s}^{-1}$ , treatments had significant differences, but the pattern is not always consistent.        | 800                   | 22        | 20+<br><b>20</b> |
|                |                  |                                     | 150                                           |             |                | -                     |                                                                     |                                                                                                                                                     |                       |           |                  |
|                |                  |                                     | 200                                           |             |                | -                     |                                                                     |                                                                                                                                                     |                       |           |                  |
|                |                  |                                     | 250                                           |             |                | -                     |                                                                     |                                                                                                                                                     |                       |           |                  |
|                | Rouxai           | 7 to 55%                            | 180                                           | 20          | Plant diameter | ↓                     | Meng et al. 2020                                                    |                                                                                                                                                     | 410                   | 22        | <b>30/33</b>     |
|                |                  |                                     |                                               |             | Dry Mass       | ↓                     |                                                                     |                                                                                                                                                     |                       |           |                  |
|                | Green Oak Leaf   | 20 and 50%                          | 200                                           | 18          | Dry Mass       | NS                    | Spalholz et al. 2020                                                | A higher 80% B showed significant differences in Red Oak Leaf                                                                                       | 704                   | 20        | <b>42</b>        |
| Red Oak Leaf   | Dry Mass         |                                     |                                               |             | NS             |                       |                                                                     |                                                                                                                                                     |                       |           |                  |
| Tiberius       | 10, 25 and 28% B | 210                                 | 16                                            | Leaf Area   | NS             | Zou et al. 2020       | The highest dry mass and leaf area occurred in the middle treatment | -(400)                                                                                                                                              | 23/21                 | <b>15</b> |                  |
|                |                  |                                     | Dry Mass                                      | NS          |                |                       |                                                                     |                                                                                                                                                     |                       |           |                  |
| Cucumber       | Cumlaude         | 10 to 75%                           | 100                                           | 18          | Leaf Area      | ↓                     | Hernandez and Kubota 2016                                           |                                                                                                                                                     | 512                   | 24.5      | <b>17</b>        |
|                |                  |                                     |                                               |             | Dry Mass       | ↓                     |                                                                     |                                                                                                                                                     |                       |           |                  |
|                |                  |                                     |                                               |             | Stem Length    | ↓                     |                                                                     |                                                                                                                                                     |                       |           |                  |
|                | Sweet Slice      | 11 to 28%                           | 200                                           | 16          | Leaf Area      | NS                    | Snowden et al. 2016                                                 |                                                                                                                                                     | 430                   | -         | <b>21</b>        |
|                |                  |                                     |                                               |             | Dry Mass       | NS                    |                                                                     |                                                                                                                                                     |                       |           |                  |
|                |                  |                                     |                                               |             | Stem Length    | NS                    |                                                                     |                                                                                                                                                     |                       |           |                  |
|                |                  |                                     |                                               |             | Petiole Length | ↓                     |                                                                     |                                                                                                                                                     |                       |           |                  |
|                | Zhongnong 26     | 14 to 27% B                         | 200                                           | 12          | Leaf Area      | ↓                     | Song et al. 2017                                                    | Results are difficult to interpret. Lowest dry mass and height were in intermediate treatments. Tallest plants occurred at the highest percent blue | 500                   | 25        | <b>15</b>        |
|                |                  |                                     |                                               |             | Dry Mass       | -                     |                                                                     |                                                                                                                                                     |                       |           |                  |
|                |                  |                                     |                                               |             | Stem Length    | -(↑)                  |                                                                     |                                                                                                                                                     |                       |           |                  |
| Zhongnong 16   | 10, 25 and 28% B | 230                                 | 16                                            | Leaf Area   | ↓              | Zou et al. 2020       |                                                                     | -(400)                                                                                                                                              | 23/21                 | <b>15</b> |                  |
|                |                  |                                     |                                               | Dry Mass    | ↓              |                       |                                                                     |                                                                                                                                                     |                       |           |                  |
|                |                  |                                     |                                               | Stem Length | ↓              |                       |                                                                     |                                                                                                                                                     |                       |           |                  |
| Tomato         | Komeett          | 0, 4 and 16% B (supplemental in GH) | 56 + GH                                       | 18          | Leaf Area      | NS                    | Hernandez and Kubota 2012                                           | Supplemental in GH                                                                                                                                  | 512                   | 24.5      | 7+ <b>11</b>     |
|                |                  |                                     |                                               | Dry Mass    | NS             |                       |                                                                     |                                                                                                                                                     |                       |           |                  |
|                |                  |                                     |                                               | Stem Length | NS             |                       |                                                                     |                                                                                                                                                     |                       |           |                  |
|                | Early Girl       | 25 and 50%                          | 160                                           | 18          | Leaf Area      | ↓                     | Wollaeger and Runkle 2014                                           |                                                                                                                                                     | -                     | 20        | <b>31/32</b>     |
|                |                  |                                     |                                               | Dry Mass    | NS             |                       |                                                                     |                                                                                                                                                     |                       |           |                  |
|                |                  |                                     |                                               | Stem Length | NS             |                       |                                                                     |                                                                                                                                                     |                       |           |                  |
|                | Early Girl       | 6 to 50%                            | 160                                           | 18          | Leaf Area      | NS                    | Wollaeger and Runkle 2015                                           |                                                                                                                                                     | -                     | 20        | <b>31 to 33</b>  |
|                |                  |                                     |                                               | Dry Mass    | NS             |                       |                                                                     |                                                                                                                                                     |                       |           |                  |
|                |                  |                                     |                                               | Stem Length | ↓              |                       |                                                                     |                                                                                                                                                     |                       |           |                  |
|                | Early girl       | 11 to 28%                           | 200                                           | 16          | Leaf Area      | ↓                     | Snowden et al. 2016                                                 |                                                                                                                                                     | 430                   | -         | <b>21</b>        |
| Dry Mass       |                  |                                     |                                               |             | ↓              |                       |                                                                     |                                                                                                                                                     |                       |           |                  |
| Stem Length    |                  |                                     |                                               |             | ↓              |                       |                                                                     |                                                                                                                                                     |                       |           |                  |
| Petiole Length |                  |                                     |                                               |             | NS             |                       |                                                                     |                                                                                                                                                     |                       |           |                  |
| Komeett        | 10 to 75%        | 100                                 | 18                                            | Leaf Area   | ↓              | Hernandez et al. 2016 |                                                                     | 509                                                                                                                                                 | 25                    | <b>21</b> |                  |
|                |                  |                                     |                                               | Dry Mass    | NS             |                       |                                                                     |                                                                                                                                                     |                       |           |                  |
|                |                  |                                     |                                               | Stem Length | ↓              |                       |                                                                     |                                                                                                                                                     |                       |           |                  |
| Qianxi         | 25 to 75%        | 300                                 | 12                                            | Leaf Area   | -              | Liu et al. 2018       | Significant differences, but no apparent trends                     | -(400)                                                                                                                                              | 28/18                 | <b>30</b> |                  |
|                |                  |                                     |                                               | Dry Mass    | -              |                       |                                                                     |                                                                                                                                                     |                       |           |                  |

**Table S2.** Effect of green photons (G) on growth and development of lettuce, cucumber and tomato. The studies included in this summary generally maintained a constant fraction of blue photons (B), while increasing the fraction of green photons (by simultaneously decreasing the fraction of red photons). In the Days column the number in bold is the number of days in the treatment, and the other number is the number of days between emergence/planting and moving the plants into the treatments.

| Green Effects |                             |                                             |                                               |            |                |           |                     |                                                              |                       |               |               |               |
|---------------|-----------------------------|---------------------------------------------|-----------------------------------------------|------------|----------------|-----------|---------------------|--------------------------------------------------------------|-----------------------|---------------|---------------|---------------|
| Species       | Cultivar                    | Range of treatments                         | PPFD ( $\mu\text{mol m}^{-2} \text{s}^{-1}$ ) | period (h) | Parameter      | Effect    | Citation            | Comment                                                      | CO <sub>2</sub> (ppm) | Temp          | Days          |               |
| Lettuce       | Waldmann's Green            | 16% B with or without 24% G                 | 150                                           | 18         | Leaf Area      | ↑         | Kim et al. 2004     |                                                              | 1200                  | 21            | <b>28</b>     |               |
|               | Red Cross                   | 31, 52 and 70% G                            | 300                                           | 16         | Dry Mass       | NS        | Li and Kubota 2009  |                                                              | -                     | 25/20         | 10+ <b>12</b> |               |
|               | Ostinata                    | 27% B with 23, 40 or 51% G                  | 150                                           | 16         | Dry Mass       | ↑         | Kong et al. 2015    |                                                              | 1200                  | 25/18         | <b>39</b>     |               |
|               | Sunmang                     | 14% B with or without 8% G                  | 24% B with or without 8% G                    | 173        | 12             | Leaf Area | NS                  | Son and Oh 2015                                              |                       | 400           | 20            | 18+ <b>28</b> |
|               |                             |                                             |                                               |            |                | Dry Mass  | NS                  |                                                              |                       |               |               |               |
|               |                             |                                             |                                               |            |                | Leaf Area | NS                  |                                                              |                       |               |               |               |
|               | Grand Rapid TBR             | 24% B with or without 8% G                  | 24% B with or without 8% G                    |            |                | Dry Mass  | ↑                   |                                                              |                       |               |               |               |
|               |                             |                                             |                                               |            |                | Leaf Area | NS                  |                                                              |                       |               |               |               |
|               |                             |                                             |                                               |            |                | Dry Mass  | NS                  |                                                              |                       |               |               |               |
|               | Green Oak Leaf              | 23% B with 30 or 53% G                      | 135                                           | 16         | Dry Mass       | NS/↓      | Chen et al. 2016    | NS compared to high yellow, ↓ compared to high red           | 350                   | 22/18         | <b>35</b>     |               |
|               | Sunmang                     | About 20% B with 7 or 13% G                 | 173                                           | 12         | Leaf Area      | ↑         | Son et al. 2016     | Two 7% G treatments. NS compared to one, ↑ compared to other | 400                   | 20            | 18+ <b>28</b> |               |
|               | Dry Mass                    | NS/↑                                        |                                               |            |                |           |                     |                                                              |                       |               |               |               |
|               | Waldmann's Green            | 1.7 to 41% G in a background of 11 to 14% B | 200                                           | 16         | Leaf Area      | ↓         | Snowden et al. 2016 |                                                              | 430                   |               | <b>21</b>     |               |
|               | Dry Mass                    | NS                                          |                                               |            |                |           |                     |                                                              |                       |               |               |               |
|               | Leaf Area                   | NS                                          |                                               |            |                |           |                     |                                                              |                       |               |               |               |
|               | Green Skirt                 | 10% G in a 10, 20 or 30% B background       | 150                                           | 16         | Plant diameter | NS        | Kang et al. 2016    |                                                              | 1000                  | 22/17         | 14+ <b>28</b> |               |
|               | Frill ice                   | 21% B with 34 or 41% G                      | 200                                           | 14         | 16             | Dry Mass  | NS                  | Yan et al. 2019                                              | 800                   | 22/18         | 20+ <b>20</b> |               |
| 250           |                             |                                             |                                               |            |                |           |                     |                                                              |                       |               |               | 14            |
| Ziwei         | 18.5% B with 32 or 45% G    | 100                                         | 14                                            | 16         | Dry Mass       | NS        | Yan et al. 2019b    | 800                                                          | 22                    | 20+ <b>20</b> |               |               |
|               |                             | 150                                         |                                               |            |                |           |                     |                                                              |                       |               |               |               |
|               |                             | 200                                         |                                               |            |                |           |                     |                                                              |                       |               |               |               |
|               |                             | 250                                         |                                               |            |                |           |                     |                                                              |                       |               |               |               |
| Rouxai        | 12% B with or without 32% G | 180                                         | 20                                            | 20         | Plant diameter | NS        | Meng et al. 2020    |                                                              | 410                   | 22            | <b>30/33</b>  |               |
|               |                             |                                             |                                               |            | Dry Mass       | NS        |                     |                                                              |                       |               |               |               |
|               |                             |                                             |                                               |            | Plant diameter | ↓         |                     |                                                              |                       |               |               |               |
|               |                             |                                             |                                               |            | Dry Mass       | ↓         |                     |                                                              |                       |               |               |               |
| Tiberius      | 15% B with 0 or 25% G       | 150                                         | 16                                            | 16         | Leaf Area      | ↑         | Li et al. 2020      |                                                              | 1000                  | 24/20         | <b>21</b>     |               |
|               |                             |                                             |                                               |            | Dry Mass       | NS        |                     |                                                              |                       |               |               |               |
| Tiberius      | 27% B with 35 or 45% G      | 210                                         | 16                                            | 16         | Leaf Area      | ↓         | Zou et al. 2020     |                                                              | -(400)                | 23/21         | <b>15</b>     |               |
|               |                             |                                             |                                               |            | Dry Mass       | ↓         |                     |                                                              |                       |               |               |               |

**Table S2.** Continued

| Species  | Cultivar     | Range of treatments                       | PPFD<br>( $\mu\text{mol m}^{-2} \text{s}^{-1}$ ) | period<br>(h) | Parameter   | Effect      | Citation                  | Comment                                      | CO <sub>2</sub><br>(ppm) | Temp  | Days  |    |
|----------|--------------|-------------------------------------------|--------------------------------------------------|---------------|-------------|-------------|---------------------------|----------------------------------------------|--------------------------|-------|-------|----|
| Cucumber | Cumlaude     | 28% G at 20%B                             | 100                                              | 18            | Leaf Area   | NS          | Hernandez and Kubota 2016 | No departure from the trend set by B effects | 512                      | 24.5  | 17    |    |
|          |              |                                           |                                                  |               | Dry Mass    | NS          |                           |                                              |                          |       |       |    |
|          |              |                                           |                                                  |               | Stem Length | NS          |                           |                                              |                          |       |       |    |
|          |              |                                           |                                                  | 200           |             |             |                           |                                              |                          |       |       |    |
|          |              | Sweet Slice                               | 13% B with 2 to 41% G                            |               | 16          | Leaf Area   | NS                        | Snowden et al. 2016                          |                          | 430   | -     | 21 |
|          |              |                                           |                                                  |               | Dry Mass    | NS          |                           |                                              |                          |       |       |    |
|          |              |                                           |                                                  |               | Stem Length | NS          |                           |                                              |                          |       |       |    |
|          |              |                                           |                                                  | 500           |             |             |                           |                                              |                          |       |       |    |
|          |              |                                           |                                                  |               |             |             |                           |                                              |                          |       |       |    |
|          |              |                                           |                                                  |               |             |             |                           |                                              |                          |       |       |    |
|          | Zhongnong 26 | 20% B with 1 to 44% G                     | 200                                              | 12            | Leaf Area   | NS          | Song et al. 2017          |                                              | 500                      | 25    | 15    |    |
|          |              |                                           |                                                  |               | Dry Mass    | ↓           |                           |                                              |                          |       |       |    |
|          |              |                                           |                                                  |               | Stem Length | NS          |                           |                                              |                          |       |       |    |
|          |              |                                           |                                                  |               |             |             |                           |                                              |                          |       |       |    |
|          | Zhongnong 16 | 27% B with 35 or 45% G                    | 230                                              | 16            | Leaf Area   | ↓           | Zou et al. 2020           |                                              | -(400)                   | 23/21 | 15    |    |
|          |              |                                           |                                                  |               | Dry Mass    | ↓           |                           |                                              |                          |       |       |    |
|          |              |                                           |                                                  |               | Stem Length | ↓           |                           |                                              |                          |       |       |    |
| Tomato   | Early Girl   | 0 and 25% G as B decreases from 50 to 25% | 160                                              | 18            | Leaf Area   | NS          | Wollaeger and Runkle 2014 |                                              | -                        | 20    | 31/32 |    |
|          |              |                                           |                                                  |               |             | Dry Mass    |                           |                                              |                          |       |       | NS |
|          |              |                                           |                                                  |               |             | Stem Length |                           |                                              |                          |       |       | NS |
|          |              |                                           |                                                  | 200           |             |             |                           |                                              |                          |       |       |    |
|          |              | Early girl                                | 1.7 to 41% G in a background of 11 to 14% B      |               | 16          | Leaf Area   | NS                        | Snowden et al. 2016                          |                          | 430   | -     | 21 |
|          |              |                                           |                                                  |               |             | Dry Mass    | NS                        |                                              |                          |       |       |    |
|          |              |                                           |                                                  |               |             | Stem Length | ↑                         |                                              |                          |       |       |    |
|          |              |                                           |                                                  | 500           |             |             |                           |                                              |                          |       |       |    |
|          |              |                                           |                                                  |               |             |             |                           |                                              |                          |       |       |    |
|          |              |                                           |                                                  |               |             |             |                           |                                              |                          |       |       |    |
|          | Komeett      | 28% G at 20% B                            | 100                                              | 18            | Leaf Area   | NS          | Hernandez et al. 2016     | No departure from the trend set by B         | 509                      | 25    | 21    |    |
|          |              |                                           |                                                  |               |             | Dry Mass    |                           |                                              |                          |       |       | NS |
|          |              |                                           |                                                  |               |             | Stem Length |                           |                                              |                          |       |       | NS |

**Figure S1.** Photos from the other two replicates of 'Red Sails' lettuce. In general, anthocyanin pigmentation was higher at a PPFD of 500  $\mu\text{mol m}^{-2} \text{s}^{-1}$ , but pigmentation in the lower fractions of blue (10%) at the higher PPFD (500  $\mu\text{mol m}^{-2} \text{s}^{-1}$ ) looked visually similar to the pigmentation at the higher fraction of blue (30%) at the lower PPFD (200  $\mu\text{mol m}^{-2} \text{s}^{-1}$ ).

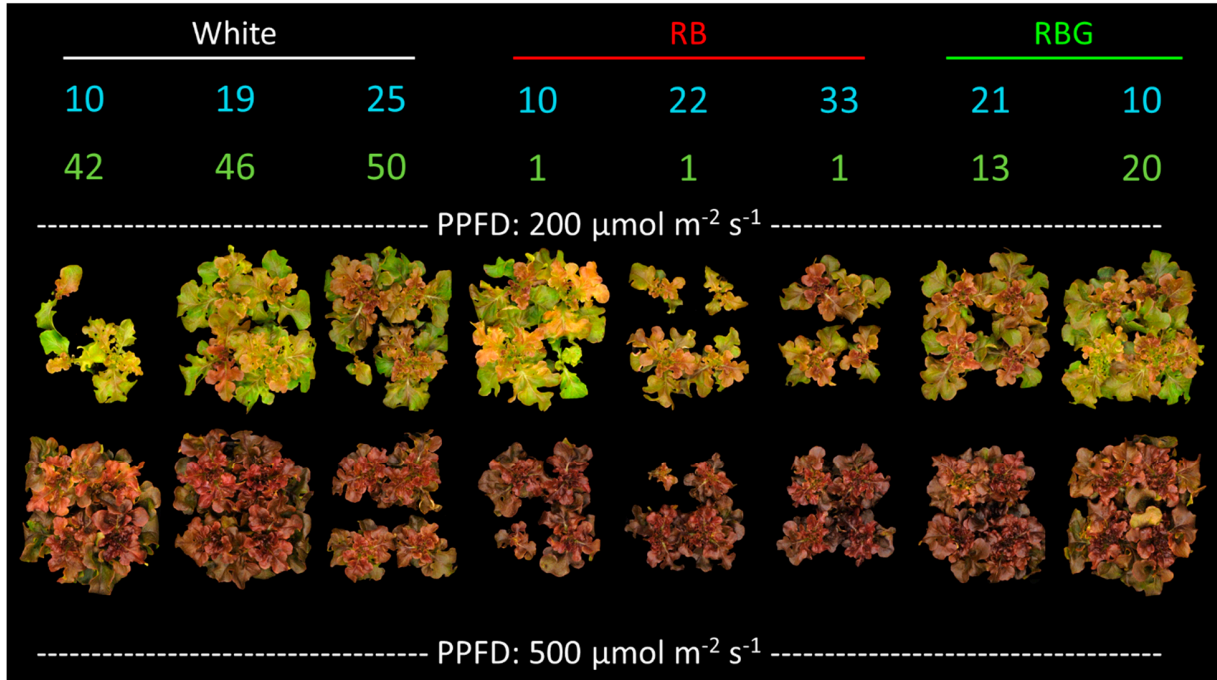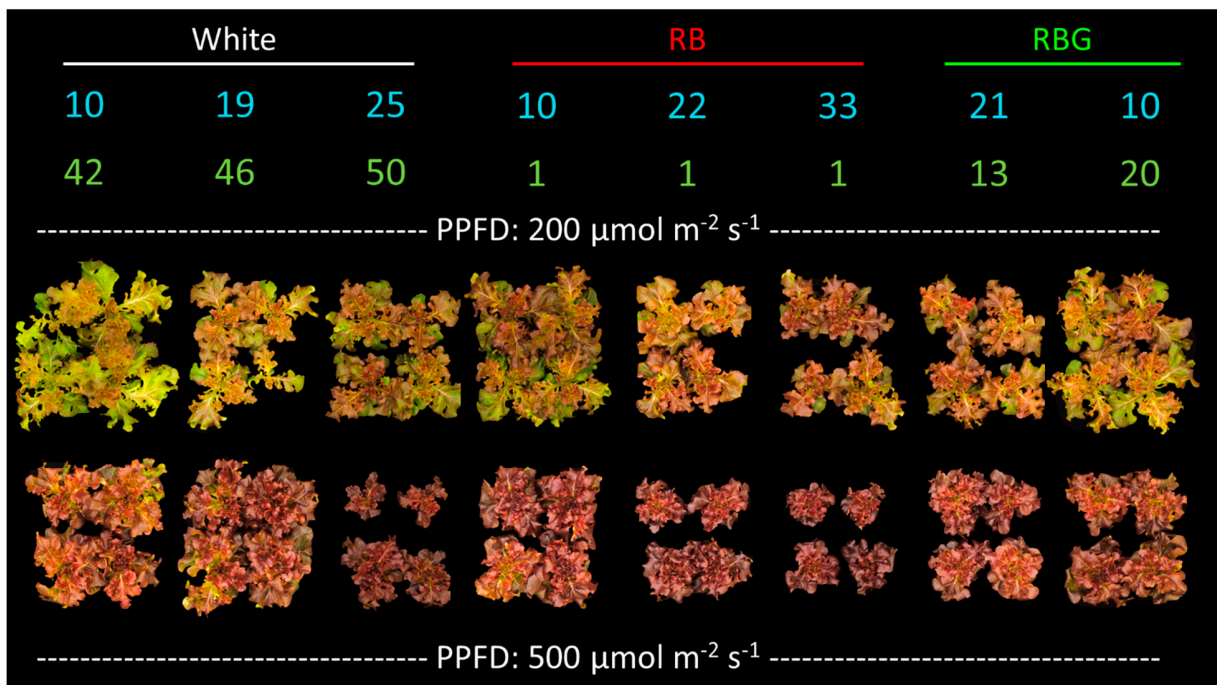

Supplement: plants-10-00637-s001.pdf [file plants-10-00637-s001.pdf]
